# Supplementary material for: Psychometric Properties of Parent–Child (0–5 years) Interaction Outcome Measures as Used in Randomized Controlled Trials of Parent Programs: A Systematic Review
Source: Springer Nature journal article supplement (doi:10.1007/s10567-019-00275-3), 2019-02-07
Supplement: MOESM2 [file 16458176]

**Psychometric Properties of Parent-Child (0-5 years) Interaction Outcome Measures as  
used in Randomized Controlled Trials of Parent Programs: A Systematic Review**

Nicole Gridley, Sarah Blower, Abby Dunn, and Tracey Bywater

Department of Health Sciences, University of York

Karen Whittaker

School of Nursing, University of Central Lancashire

Maria Bryant

Leeds Institute of Clinical Trials Research, University of Leeds

Correspondence concerning this article should be addressed to Nicole Gridley, School of  
Education, Leeds Beckett University, Leeds, LS6 3QQ

Email: [n.gridley@leedsbeckett.ac.uk](mailto:n.gridley@leedsbeckett.ac.uk)

*Online Resources Table 2.*

Terwee (2011) criteria for good measurement properties

| Measurement property                         | Rating | Criteria                                                                                                                                                                                            | Source                  |
|----------------------------------------------|--------|-----------------------------------------------------------------------------------------------------------------------------------------------------------------------------------------------------|-------------------------|
| <b>Reliability</b>                           |        |                                                                                                                                                                                                     |                         |
| Internal consistency<br>(CTT methods)        | +      | Cronbach alpha(s) > 0.70                                                                                                                                                                            | Terwee et al.<br>2007   |
|                                              | ?      | Cronbach alpha(s) not determined OR dimensionality unknown OR conflicting evidence                                                                                                                  |                         |
|                                              | -      | Cronbach alpha(s) < 0.70                                                                                                                                                                            |                         |
| Internal consistency<br>(IRT methods)        | +      | Person Separation Index > 0.70                                                                                                                                                                      | Heinl et al.<br>(2016)  |
|                                              | ?      | Person Separation Index not determined                                                                                                                                                              |                         |
|                                              | -      | Person Separation Index < 0.70                                                                                                                                                                      |                         |
| Measurement error                            | +      | MIC > SDC OR MIC outside the LOA                                                                                                                                                                    | Terwee et al.<br>(2007) |
|                                              | ?      | MIC not defined                                                                                                                                                                                     |                         |
|                                              | -      | MIC < SDC OR MIC equals or inside LOA                                                                                                                                                               |                         |
| Reliability<br>(inter-rater and test-retest) | +      | ICC/weighted Kappa > 0.70 OR Pearson's r > 0.80                                                                                                                                                     | Heinl et al.<br>(2016)  |
|                                              | ?      | Neither ICC/weighted Kappa or Pearson's r calculated                                                                                                                                                |                         |
|                                              | -      | ICC/weighted Kappa > 0.70 OR Pearson's r > 0.80                                                                                                                                                     |                         |
| <b>Validity</b>                              |        |                                                                                                                                                                                                     |                         |
| Content validity                             | +      | All items are considered to be relevant for the construct to be measured, for the target population, and for the purpose of the measurement AND the questionnaire is considered to be comprehensive | Terwee et al.<br>(2007) |
|                                              | ?      | Not enough information available                                                                                                                                                                    |                         |
|                                              | -      | Not all items are considered to be relevant for the construct to be measured, for the target population, and for the purpose of the                                                                 |                         |

| Measurement property                               | Rating | Criteria                                                                                                                                                                                                                                                                             | Source                                                                 |
|----------------------------------------------------|--------|--------------------------------------------------------------------------------------------------------------------------------------------------------------------------------------------------------------------------------------------------------------------------------------|------------------------------------------------------------------------|
|                                                    |        | measurement OR the questionnaire is not considered to be comprehensive                                                                                                                                                                                                               |                                                                        |
| Structural validity (CTT methods)                  | +      | Factors should explain at least 50% of the variance OR CFI or TLI or comparable measure > 0.95 AND (RMSEA < 0.06 OR SRMR < 0.08)                                                                                                                                                     | Terwee et al. (2007) and modified version available on COSMIN website. |
|                                                    | ?      | Not all information for '+' reported                                                                                                                                                                                                                                                 |                                                                        |
|                                                    | -      | Criteria for '+' not met                                                                                                                                                                                                                                                             |                                                                        |
| Structural validity (IRT methods)                  | +      | Residual correlations among the items after controlling for the dominant factor < 0.20 OR Q3's < 0/37, item scalability > 0.30, IRT model fit: G2 > 0.01, no DIF for important subject characteristics (such as age, gender, education): McFadden's R2 < 0/02, OR no non-uniform DIF | Terwee et al. (2007) and modified version available on COSMIN website. |
|                                                    | ?      | Important statistics not reported                                                                                                                                                                                                                                                    |                                                                        |
|                                                    | -      | Criteria for '+' not met                                                                                                                                                                                                                                                             |                                                                        |
| Hypothesis Testing (convergent/divergent validity) | +      | Correlations with instruments measuring the same construct > 0.50 OR at least 75% of the results are in accordance with the hypotheses AND correlation with related constructs is higher than with unrelated constructs                                                              | Terwee et al. (2007)                                                   |
|                                                    | ?      | Solely correlations determined with unrelated constructs                                                                                                                                                                                                                             |                                                                        |
|                                                    | -      | Correlations with instruments measuring the same construct < 0.50 OR < 75% of the results are in accordance with the hypotheses OR correlation with related constructs is higher than with unrelated constructs                                                                      |                                                                        |
| Hypothesis Testing (discriminant/known groups)     | +      | Differences in scores on the measurement instrument for all evaluated patient subgroups are statistically significant OR > 75% of results in accordance with hypotheses                                                                                                              | Heinl et al. (2016)                                                    |
|                                                    | ?      | Some differences statistically significant, others not                                                                                                                                                                                                                               |                                                                        |

| Measurement property | Rating | Criteria                                                                                                                                                                    | Source                                       |
|----------------------|--------|-----------------------------------------------------------------------------------------------------------------------------------------------------------------------------|----------------------------------------------|
|                      | -      | Differences in scores on the measurement instrument for all evaluated patient subgroups are not statistically significant OR < 75% of results in accordance with hypotheses |                                              |
| Criterion validity   | +      | Convincing arguments that gold standard is “gold” AND correlation with gold standard > 0.70 OR (sensitivity AND specificity > 70%)                                          | Terwee et al. (2007)<br>de Vet et al. (2015) |
|                      | ?      | Not all information for ‘+’ reported                                                                                                                                        |                                              |
|                      | -      | Criteria for ‘+’ not met                                                                                                                                                    |                                              |
| Responsiveness       | +      | SDC or SDC < MIC OR MIC outside the LOA OR RR > 1.96 OR AUC > .70                                                                                                           | Modified Terwee et al. (2007)                |
|                      | ?      | Doubtful design or method                                                                                                                                                   |                                              |
|                      | -      | SDC or SDC > MIC OR MIC equals or inside LOA OR RR < 1.96 OR AUC < .70 despite adequate design and methods                                                                  |                                              |
